# Supplementary material
Source: PubMed Central journal article supplement (PMC1088373)

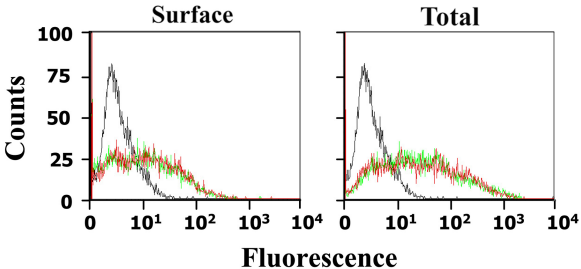

Supplement: pnas_102_18_6443__1.pdf [file pnas_102_18_6443__1.pdf]

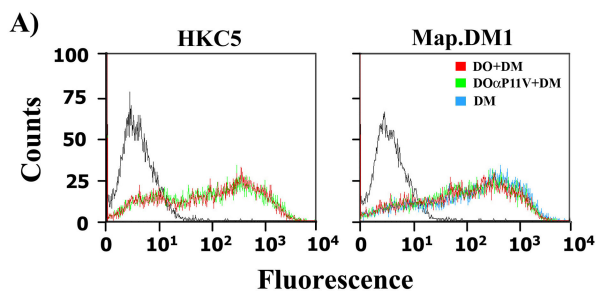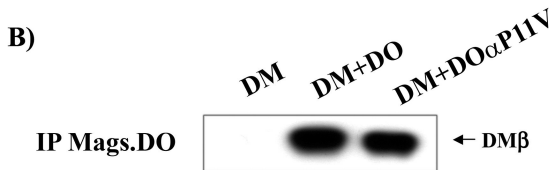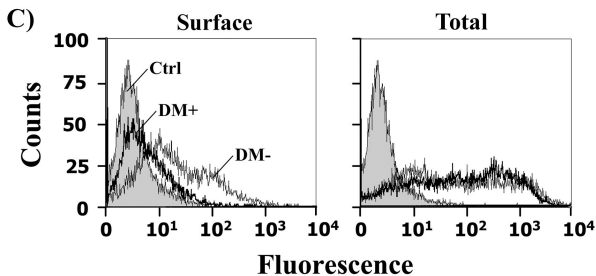

Supplement: pnas_102_18_6443__2.pdf [file pnas_102_18_6443__2.pdf]
